# Supplementary material for: Genome Comparison Reveals Mutation Hotspots in the Chloroplast Genome and Phylogenetic Relationships of Ormosia Species
Source: PubMed Central journal article supplement (PMC6720362; doi:10.1155/2019/7265030), 2019-08-21

# Genome Comparison Reveals Sequence Divergence and Mutation Hotspots in the Chloroplast Genome of *Ormosia* Species

Hongshan Liu<sup>1,2†</sup>, Zihai Su<sup>2†</sup>, Shuiqing Yu<sup>2</sup>, Jialin Liu<sup>2</sup>, Xiaojuan Yin<sup>2</sup>, Guowei Zhang<sup>2</sup>, Wei Liu<sup>2</sup>, Bin Li<sup>1\*</sup>

<sup>1</sup>State Key Laboratory of Tree Breeding and Forest Genetics, Key Laboratory of Tree Breeding and Cultivation of State Forestry Administration, Research Institute of Forestry, Chinese Academy of Forestry, Beijing, 100091, China;

<sup>2</sup>Administration Bureau of Hongyashan State Owned Forest Farm of Hebei Province, Yixian, 074200, China

† Hongshan Liu and Zihai Su have contributed equally to this work.

Correspondence: Bin Li, E-mail: [libin1200@163.com](mailto:libin1200@163.com)

Table S1. A list of the 72 taxa sampled from GenBank in this study for phylogeny analysis.

Figure S1. Phylogenetic tree reconstruction of 82 taxa using Bayesian inference methods based on 81 genes chloroplast genome sequences.

Table S1. A list of the 72 taxa sampled from GenBank in this study for phylogeny analysis.

| Organism                         | Accession | Sequence Length | %GC    | Family   | Subfamily        |
|----------------------------------|-----------|-----------------|--------|----------|------------------|
| <i>Libidibia coriaria</i>        | KJ468095  | 158045          | 36.50% | Fabaceae | Caesalpinioideae |
| <i>Mezoneuron cucullatum</i>     | KU569489  | 158357          | 36.40% | Fabaceae | Caesalpinioideae |
| <i>Haematoxylum brasiletto</i>   | KJ468097  | 157728          | 36.70% | Fabaceae | Caesalpinioideae |
| <i>Senna occidentalis</i>        | MF358692  | 159993          | 36.20% | Fabaceae | Caesalpinioideae |
| <i>Acacia burkittii</i>          | LN885253  | 174711          | 36.10% | Fabaceae | Caesalpinioideae |
| <i>Senegalia laeta</i>           | KY100269  | 162754          | 35.80% | Fabaceae | Caesalpinioideae |
| <i>Vachellia flava</i>           | KY100263  | 165829          | 35.30% | Fabaceae | Caesalpinioideae |
| <i>Albizia odoratissima</i>      | KX852437  | 174861          | 35.60% | Fabaceae | Caesalpinioideae |
| <i>Archidendron lucyi</i>        | KX852438  | 176870          | 35.20% | Fabaceae | Caesalpinioideae |
| <i>Faidherbia albida</i>         | KX852440  | 175646          | 35.30% | Fabaceae | Caesalpinioideae |
| <i>Inga leiocalycina</i>         | KT428296  | 175489          | 35.50% | Fabaceae | Caesalpinioideae |
| <i>Pararchidendron pruinatum</i> | KX852441  | 176692          | 35.30% | Fabaceae | Caesalpinioideae |
| <i>Pithecellobium flexicaule</i> | KX852444  | 178887          | 35.10% | Fabaceae | Caesalpinioideae |
| <i>Samanea saman</i>             | KX852445  | 176717          | 35.30% | Fabaceae | Caesalpinioideae |
| <i>Adenantha microsperma</i>     | KX852436  | 159389          | 36.50% | Fabaceae | Caesalpinioideae |
| <i>Dichrostachys cinerea</i>     | KX852439  | 161240          | 35.90% | Fabaceae | Caesalpinioideae |
| <i>Leucaena trichandra</i>       | KT428297  | 164692          | 35.60% | Fabaceae | Caesalpinioideae |
| <i>Parkia javanica</i>           | KX852442  | 161681          | 35.90% | Fabaceae | Caesalpinioideae |
| <i>Piptadenia communis</i>       | KX852443  | 162552          | 35.90% | Fabaceae | Caesalpinioideae |
| <i>Prosopis glandulosa</i>       | KJ468101  | 163040          | 35.90% | Fabaceae | Caesalpinioideae |
| <i>Ceratonia siliqua</i>         | KJ468096  | 156367          | 36.70% | Fabaceae | Caesalpinioideae |
| <i>Adenolobus garipensis</i>     | KY806280  | 151705          | 36.90% | Fabaceae | Cercidoideae     |
| <i>Barklya syringifolia</i>      | MF135594  | 158740          | 36.40% | Fabaceae | Cercidoideae     |
| <i>Bauhinia acuminata</i>        | MF135595  | 155548          | 36.50% | Fabaceae | Cercidoideae     |
| <i>Lysiphyllum hookeri</i>       | MF135601  | 154055          | 36.60% | Fabaceae | Cercidoideae     |
| <i>Piliostigma thonningii</i>    | MF135598  | 165416          | 36.40% | Fabaceae | Cercidoideae     |
| <i>Schnella trichosepala</i>     | MF135599  | 159722          | 36.20% | Fabaceae | Cercidoideae     |
| <i>Griffonia simplicifolia</i>   | MF135596  | 157909          | 36.30% | Fabaceae | Cercidoideae     |

|                                                         |          |        |        |          |                |
|---------------------------------------------------------|----------|--------|--------|----------|----------------|
| <i>Cercis canadensis</i>                                | KF856619 | 158995 | 36.20% | Fabaceae | Cercidoideae   |
| <i>Afzelia africana</i>                                 | KX673213 | 159603 | 36.10% | Fabaceae | Detarioideae   |
| <i>Intsia bijuga</i>                                    | KX673214 | 159215 | 36.20% | Fabaceae | Detarioideae   |
| <i>Daniellia pilosa</i>                                 | MG599083 | 159243 | 36.00% | Fabaceae | Detarioideae   |
| <i>Crudia harmsiana</i>                                 | MG599082 | 158253 | 36.40% | Fabaceae | Detarioideae   |
| <i>Guibourtia leonensis</i>                             | MG564755 | 159295 | 36.10% | Fabaceae | Detarioideae   |
| <i>Tamarindus indica</i>                                | KJ468103 | 159551 | 36.20% | Fabaceae | Detarioideae   |
| <i>Caragana korshinskii</i>                             | KX289923 | 129331 | 34.40% | Fabaceae | Papilionoideae |
| <i>Tibetia liangshanensis</i>                           | MF193597 | 123372 | 34.70% | Fabaceae | Papilionoideae |
| <i>Cicer arietinum</i>                                  | EU835853 | 125319 | 33.90% | Fabaceae | Papilionoideae |
| <i>Arachis hypogaea</i>                                 | KJ468094 | 156395 | 36.40% | Fabaceae | Papilionoideae |
| <i>Dalbergia odorifera</i>                              | MF668133 | 156064 | 36.10% | Fabaceae | Papilionoideae |
| <i>Lathyrus japonicus</i>                               | KJ806194 | 124242 | 34.90% | Fabaceae | Papilionoideae |
| <i>Lens culinaris</i>                                   | KF186232 | 123096 | 34.40% | Fabaceae | Papilionoideae |
| <i>Pisum fulvum</i>                                     | MG458702 | 120837 | 34.90% | Fabaceae | Papilionoideae |
| <i>Vicia faba</i>                                       | KF042344 | 123722 | 34.60% | Fabaceae | Papilionoideae |
| <i>Astragalus membranaceus</i> var. <i>membranaceus</i> | KX255662 | 123623 | 34.10% | Fabaceae | Papilionoideae |
| <i>Carmichaelia australis</i>                           | MF597719 | 122805 | 34.30% | Fabaceae | Papilionoideae |
| <i>Glycyrrhiza glabra</i>                               | KF201590 | 127943 | 34.20% | Fabaceae | Papilionoideae |
| <i>Lessertia frutescens</i>                             | MF286764 | 122700 | 34.20% | Fabaceae | Papilionoideae |
| <i>Lupinus albus</i>                                    | KJ468099 | 154140 | 36.50% | Fabaceae | Papilionoideae |
| <i>Cyamopsis tetragonoloba</i>                          | MF352008 | 152530 | 35.40% | Fabaceae | Papilionoideae |
| <i>Indigofera tinctoria</i>                             | KJ468098 | 158367 | 35.80% | Fabaceae | Papilionoideae |
| <i>Lotus japonicus</i>                                  | AP002983 | 150519 | 36.00% | Fabaceae | Papilionoideae |
| <i>Millettia pinnata</i>                                | JN673818 | 152968 | 34.80% | Fabaceae | Papilionoideae |
| <i>Wisteria floribunda</i>                              | KM103376 | 130960 | 34.30% | Fabaceae | Papilionoideae |
| <i>Apios americana</i>                                  | KF856618 | 148772 | 35.50% | Fabaceae | Papilionoideae |
| <i>Cajanus cajan</i>                                    | KU729879 | 152242 | 35.00% | Fabaceae | Papilionoideae |
| <i>Glycine stenophita</i>                               | KC893634 | 152618 | 35.30% | Fabaceae | Papilionoideae |
| <i>Glycine soja</i>                                     | KF611800 | 152217 | 35.40% | Fabaceae | Papilionoideae |
| <i>Pachyrhizus erosus</i>                               | KJ468100 | 151947 | 35.30% | Fabaceae | Papilionoideae |
| <i>Phaseolus vulgaris</i>                               | DQ886273 | 150285 | 35.40% | Fabaceae | Papilionoideae |
| <i>Vigna angularis</i>                                  | AP012598 | 151683 | 35.20% | Fabaceae | Papilionoideae |
| <i>Robinia pseudoacacia</i>                             | KJ468102 | 154835 | 35.90% | Fabaceae | Papilionoideae |
| <i>Maackia floribunda</i>                               | KX388160 | 154541 | 36.50% | Fabaceae | Papilionoideae |

|                                            |          |        |        |          |                |
|--------------------------------------------|----------|--------|--------|----------|----------------|
| Salweenia<br>bouffordiana                  | MF449303 | 153730 | 36.80% | Fabaceae | Papilionoideae |
| Sophora<br>alopecuroides                   | MF100928 | 154108 | 36.60% | Fabaceae | Papilionoideae |
| Styphnolobium<br>japonicum f.<br>violaceum | KY872756 | 158837 | 36.10% | Fabaceae | Papilionoideae |
| Ammopiptanthus<br>mongolicus               | KY034453 | 153935 | 36.90% | Fabaceae | Papilionoideae |
| Medicago falcata                           | KX831887 | 124430 | 34.00% | Fabaceae | Papilionoideae |
| Trifolium<br>glanduliferum                 | KJ788285 | 126149 | 34.50% | Fabaceae | Papilionoideae |
| Morus indica                               | DQ226511 | 158484 | 36.40% | Moraceae |                |

---

Figure S1. Phylogenetic tree reconstruction of 82 taxa using Bayesian inference methods based on 81 genes chloroplast genome sequences.

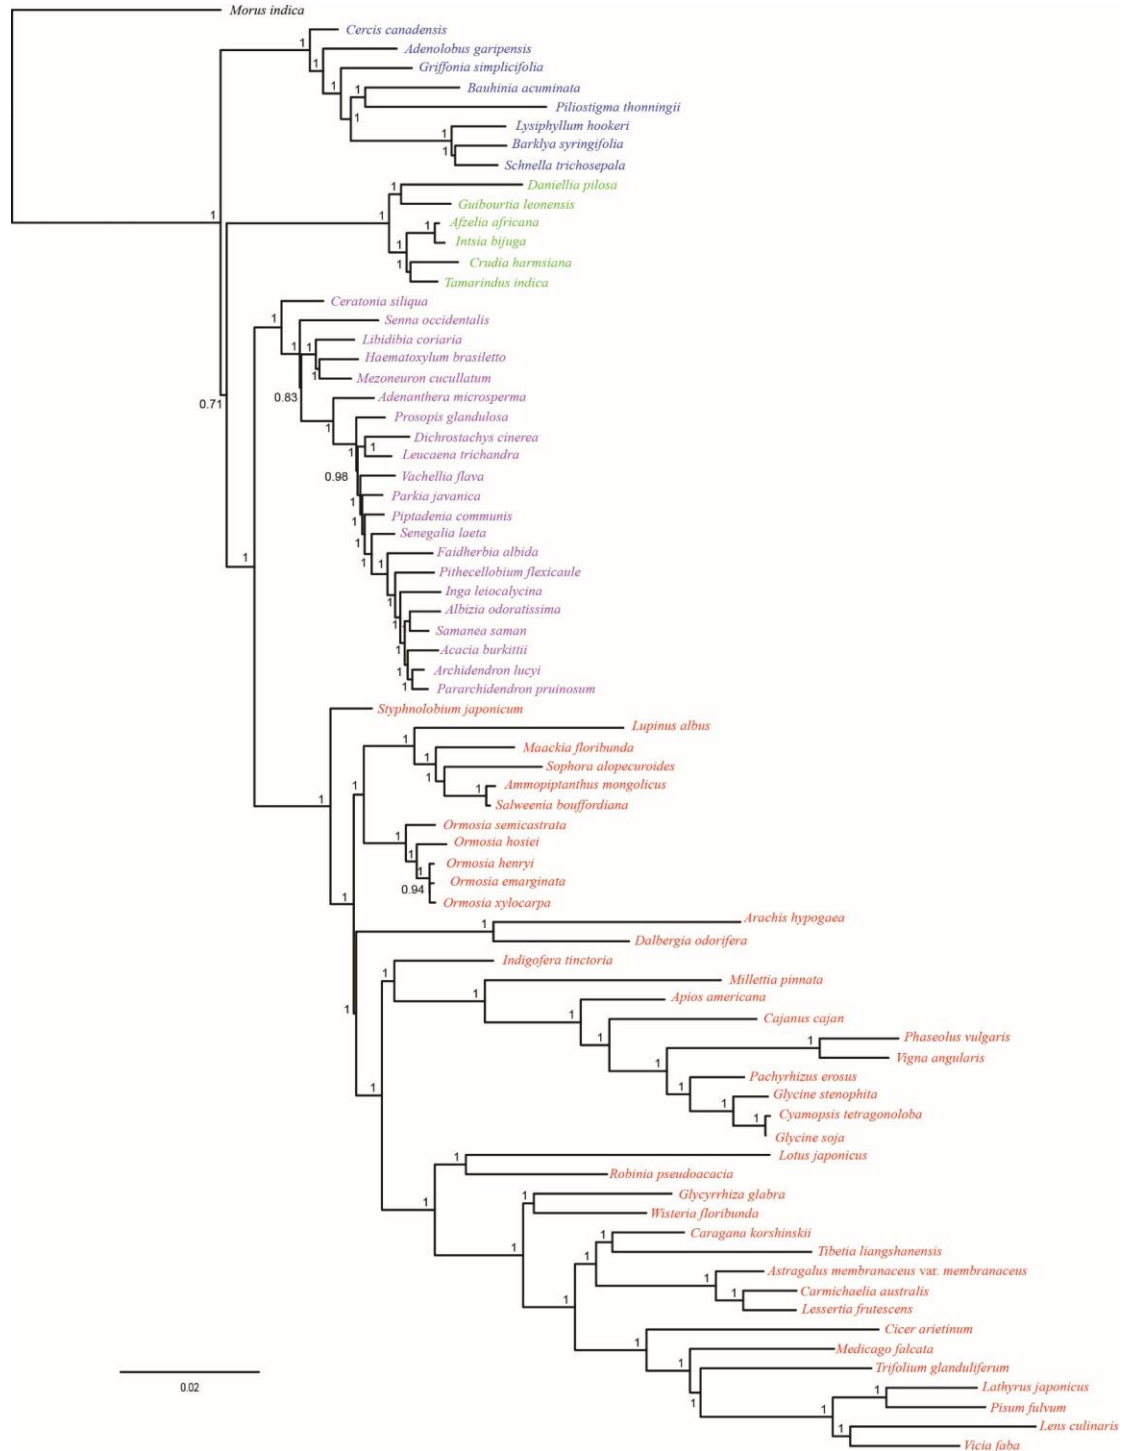

Supplement: 7265030.f1.pdf [file 7265030.f1.pdf]
